# Supplementary material
Source: publisher figshare collection journal article supplement (https://acs.figshare.com/ndownloader/files/4650847)
Supplement: Supplementary file 1 [file 4650847]

# Supporting Information for

## Hidden Electronic Excited State of Enhanced Green Fluorescent Protein

*Haruko Hosoi<sup>†</sup>, Shoichi Yamaguchi<sup>†</sup>, Hideaki Mizuno<sup>‡</sup>, Atsushi Miyawaki<sup>‡</sup>, and Tahei Tahara<sup>\*†</sup>*

### 1. TPA Spectra

The TPA measurements of the proteins were carried out with three different  $\omega_1$  wavelengths of 1300, 1490, and 1820 nm as shown in Figure S1. The spectra measured with the three  $\omega_1$  were smoothly connected to provide TPA spectrum in the wide wavelength range for each protein.

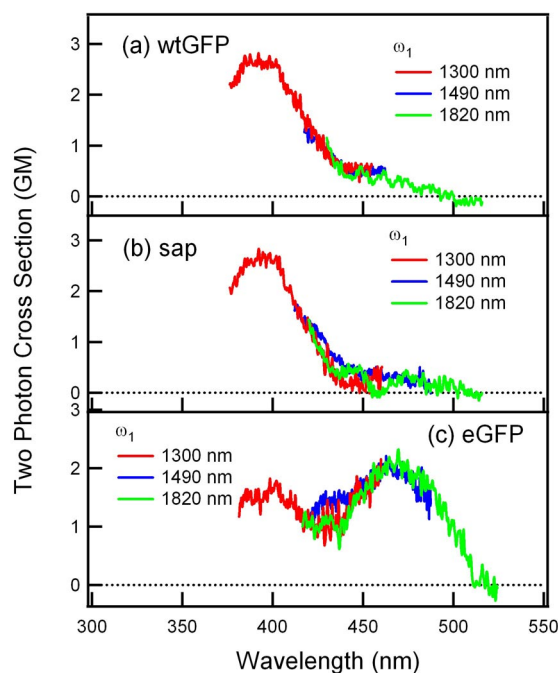

**Figure S1.** Two-photon absorption spectra of wtGFP (a), sap (b), and eGFP (c) measured with the  $\omega_1$  wavelengths of 1300, 1490, and 1820 nm.

## 2. One-photon and two-photon absorption spectra of a coumarin dye, coumarin 153

(a)

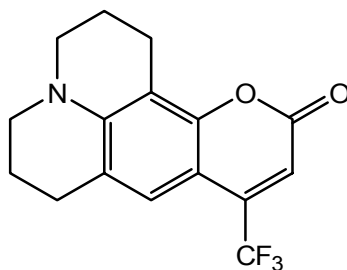

(b)

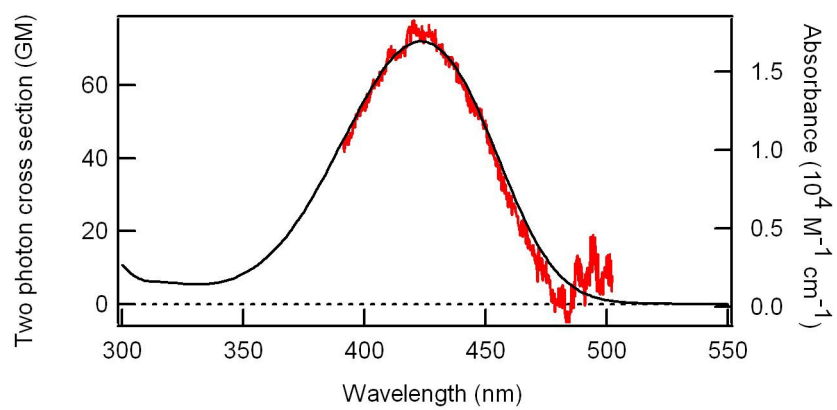

**Figure S2.** (a) Structure of coumarin 153. (b) One-photon (black) and two-photon (red) absorption spectra of coumarin 153 in methanol solution (9.3 mM,  $\omega_1$  : 1440 nm).

3. OPA and TPA spectra of eGFP and the anion of HBDI plotted with a wavenumber axis.

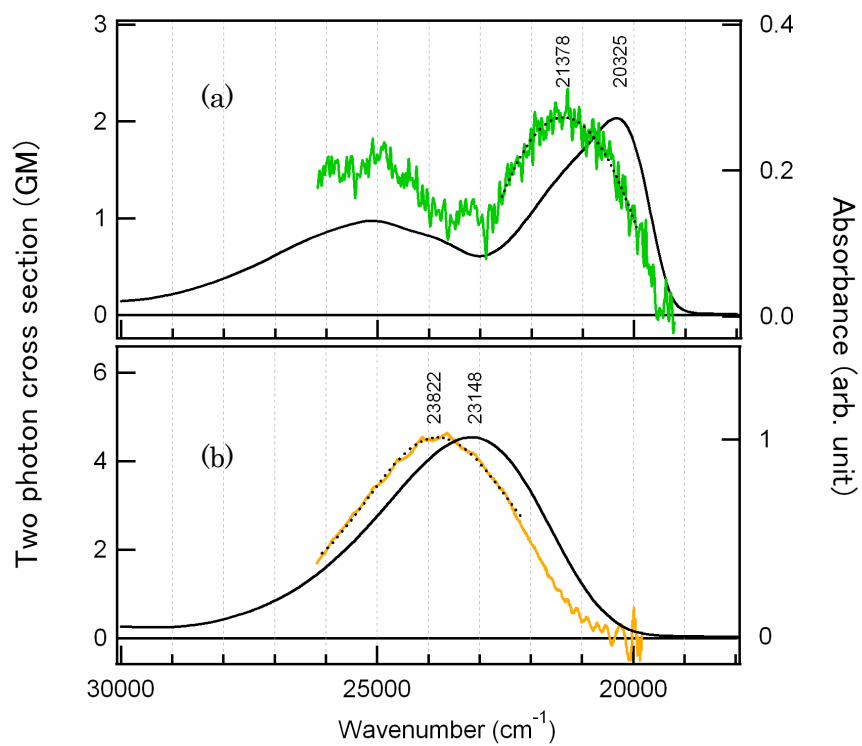

**Figure S3.** One-photon (black) and two-photon (color) absorption spectra of eGFP (a) and the anion of HBDI in methanol (b). Dotted lines indicate the fitting results using a Gaussian function.

#### 4. Steady state fluorescence spectra of eGFP

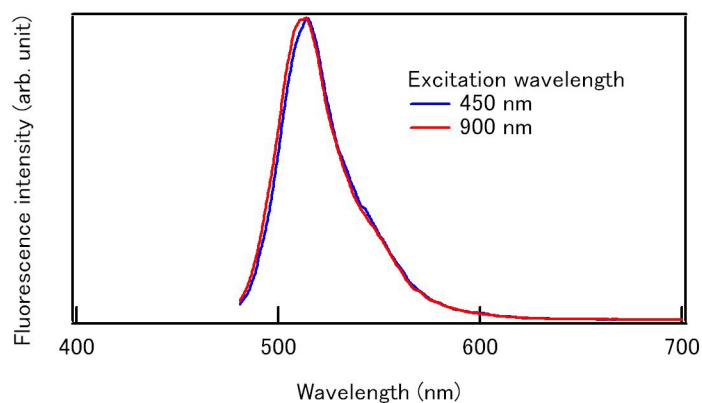

**Figure S4.** Fluorescence spectra of eGFP obtained with one-photon excitation (450 nm, blue) and two-photon excitation (900 nm, red).

#### 5. Time-resolved fluorescence signals of eGFP

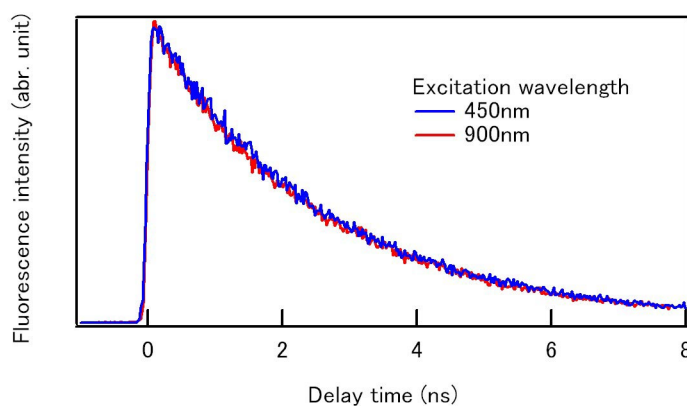

**Figure S5.** Time-resolved fluorescence signals (observed in the range of 500-550 nm) of eGFP observed with one-photon excitation (450 nm, blue) and two-photon excitation (900 nm, red).
